# Supplementary material
Source: Royal Society of Chemistry journal article supplement (doi:10.1039/d6cc02341j)
Supplement: d6cc02341j1.pdf [file d6cc02341j1.pdf]

## Supporting Information

### Controlled electrochemical deposition of metal nanostructures on DNA origami templates

Mo Xie,<sup>abc</sup> Yang Hu,<sup>abc</sup> Wenwu Ding,<sup>abc</sup> Mengyao Sun,<sup>abc</sup> Shao Su,<sup>abd</sup> Huajie Liu,<sup>e</sup> Lianhui Wang<sup>abd</sup> and Jie Chao<sup>\*abd</sup>

<sup>a</sup> State Key Laboratory for Flexible Electronics (LoFE), Nanjing University of Posts and Telecommunications, Nanjing, China. E-mail: iamjchao@njupt.edu.cn.

<sup>b</sup> Jiangsu Key Laboratory of Smart Biomaterials and Theranostic Technology, Nanjing University of Posts and Telecommunications, Nanjing, China.

<sup>c</sup> College of Materials Science and Engineering, Nanjing University of Posts and Telecommunications, Nanjing, 210023, China.

<sup>d</sup> School of Chemistry and Life Sciences, Nanjing University of Posts and Telecommunications, Nanjing 210023, China.

<sup>e</sup> Key Laboratory of Advanced Civil Engineering Materials of Ministry of Education, School of Chemical Science and Engineering, Shanghai Research Institute for Intelligent Autonomous Systems, Tongji University, Shanghai 200092, China.

\*Corresponding author: iamjchao@njupt.edu.cn.

## **Materials and Methods**

### **Materials and instruments**

M13mp18 DNA (7249 nucleotides) was purchased from BIORULER (Jiangsu, China). All short DNA strands were synthesized by Sangon (Shanghai, China) with ULTRAPAGE purified (sequences listed in Supplementary information). Reagents were purchased from Sinopharm (Shanghai, China) and Sigma-Aldrich (Shanghai, China) and used without further purification. All aqueous solutions were prepared with Milli-Q water (resistivity = 18.2 M $\Omega$  cm). Silicon wafer (single side polished with a thickness of 500  $\pm$  10  $\mu$ m, N-type, <111>) was purchased from Nanjing Jincaxin Technology Co., LTD (Nanjing, China). The samples were prepared by CHI660D electrochemical workstation (Shanghai, China). AFM imaging was performed using Bruker multimode VIII atomic force microscopy (Veeco Inc., USA). SEM measurements were obtained by HITACHI S-4800 scanning electron microscope (Tokyo, Japan).

### **Preparation of substrate**

Firstly, the purchased silicon wafers were cut into 1 cm  $\times$  1 cm sizes. Next, the silicon wafers were soaked in ethanol and ultrasonically cleaned for 10 minutes, followed by soaking in ultrapure water for another 10 minutes of ultrasonic cleaning. After drying, the wafers were immersed in a piranha solution (concentrated H<sub>2</sub>SO<sub>4</sub> and H<sub>2</sub>O<sub>2</sub> volume ratio of 7:3) for 30 minutes. Subsequently, the piranha solution was washed off the surface of the wafers with ultrapure water, then immersed and ultrasonically cleaned with ethanol and ultrapure water for 10 minutes, respectively. Finally, the cleaned wafers were soaked in ultrapure water for later use.

### **Preparation of DNA origami template**

The M13mp18 DNA scaffold, original staple strands, and extended staple strands were mixed at a molar ratio of 1:10:10 in 1× TAE-Mg<sup>2+</sup> (40 mM Tris, 20 mM acetic acid, 2 mM EDTA, 12.5 mM magnesium acetate, pH 8.0) buffer. The mixture was annealed from 95 °C to 25 °C at a rate of 1 °C/min. Subsequently, the assembled DNA origami was transferred to a 100 kDa (MWCO) centrifuge filters, and 1× TA-Mg<sup>2+</sup> (40 mM Tris, 20 mM acetic acid, 12.5 mM magnesium acetate, pH 8.0) buffer was added. The sample was centrifuged three times for filtration to remove the extra staple strands. The concentration of the purified DNA origami was measured by UV-vis spectroscopy.

### **Electrochemical deposition process of metals**

The DNA origami template and metal salts were mixed in 1× TA-Mg<sup>2+</sup> solution with a final concentration of 3 nM for DNA origami and 0.5–8 mM for metal ions. The mixture was incubated for 3–4 h at room temperature to ensure sufficient interact between the metal ions and the extended DNA strands on the template.

Before performing electrochemical deposition of metals, the cleaned silicon wafers were ultrasonically cleaned again in ethanol and ultrapure water for 10 minutes each, followed by drying with nitrogen gas. Subsequently, the wafers were treated with a highly concentration Mg<sup>2+</sup> solution (50 mM) for 10 minutes to enhance the adsorption between the DNA origami and the silicon wafer surface. After treatment, the wafers were dried again with nitrogen gas. Subsequently, 5 µL DNA origami template and metal salts incubated mixture was added onto the surface of the silicon wafer and adsorbed for 3–5 minutes.

The electrochemical deposition process was carried out using a three-electrode system, where the working electrode, reference electrode, and auxiliary electrode used were silicon wafer substrate, Ag/AgCl, and platinum wire, respectively. Then 50  $\mu\text{L}$  of  $1 \times \text{TA-Mg}^{2+}$  solution containing 0.5–8 mM metal ions were added to form a droplet on the silicon surface. The reference and counter electrodes were inserted into the droplet, and the system was connected to the electrochemical workstation for potentiostatic deposition. The determination of the metal deposition potential was based on the linear sweep voltammetry (LSV) curve of the metal salt solution. The appropriate potential for potentiostatic deposition was selected from the region where the current was negative and the slope increased rapidly.

The optimal deposition parameters (potential and time) were as follows: Ag ( $-0.8 \text{ V}$ , 60 s), Cu ( $-1.5 \text{ V}$ , 60 s), Au (0 V, 60 s), and Fe ( $-2.0 \text{ V}$ , 60 s). For alloys, Ag-Cu was deposited at  $-2.0 \text{ V}$  for 60 s, and Fe-Cu at  $-1.7 \text{ V}$  for 60 s. For Ag/Cu composites, Ag was deposited at  $-0.8 \text{ V}$  for 60 s, followed by Cu at  $-1.5 \text{ V}$  for 40 s.

### **AFM characterization**

The DNA origami adsorbed on the silicon wafer and the metal nanostructures fabricated via electrochemical deposition were imaged using the “PeakForce QNM in Fluid” mode with “SCANASYST-FLUID+” tips. The images were analyzed using NanoScope Analysis software.

### **SEM characterization**

The metal samples deposited on the silicon wafer were gently rinsed with ultrapure water to remove the salt solution, followed by drying with nitrogen gas. Next, the wafer was secured to

the sample stage using conductive tape for SEM characterization, with a potential of 5 kV. The area containing the target structure was selected for elemental analysis.

## Supplementary Figures

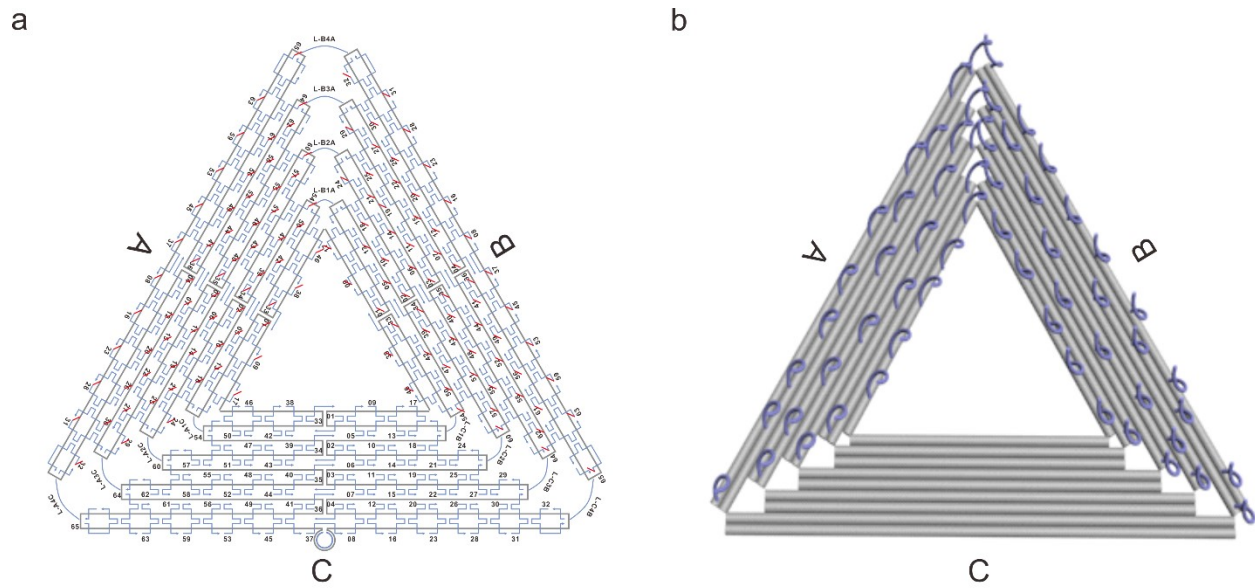

**Figure S1.** (a) Design of triangular DNA origami template with staples on both sides A and B extended by 15 bases. (b) Schematic diagram of triangular DNA origami template with a V-shaped pattern.

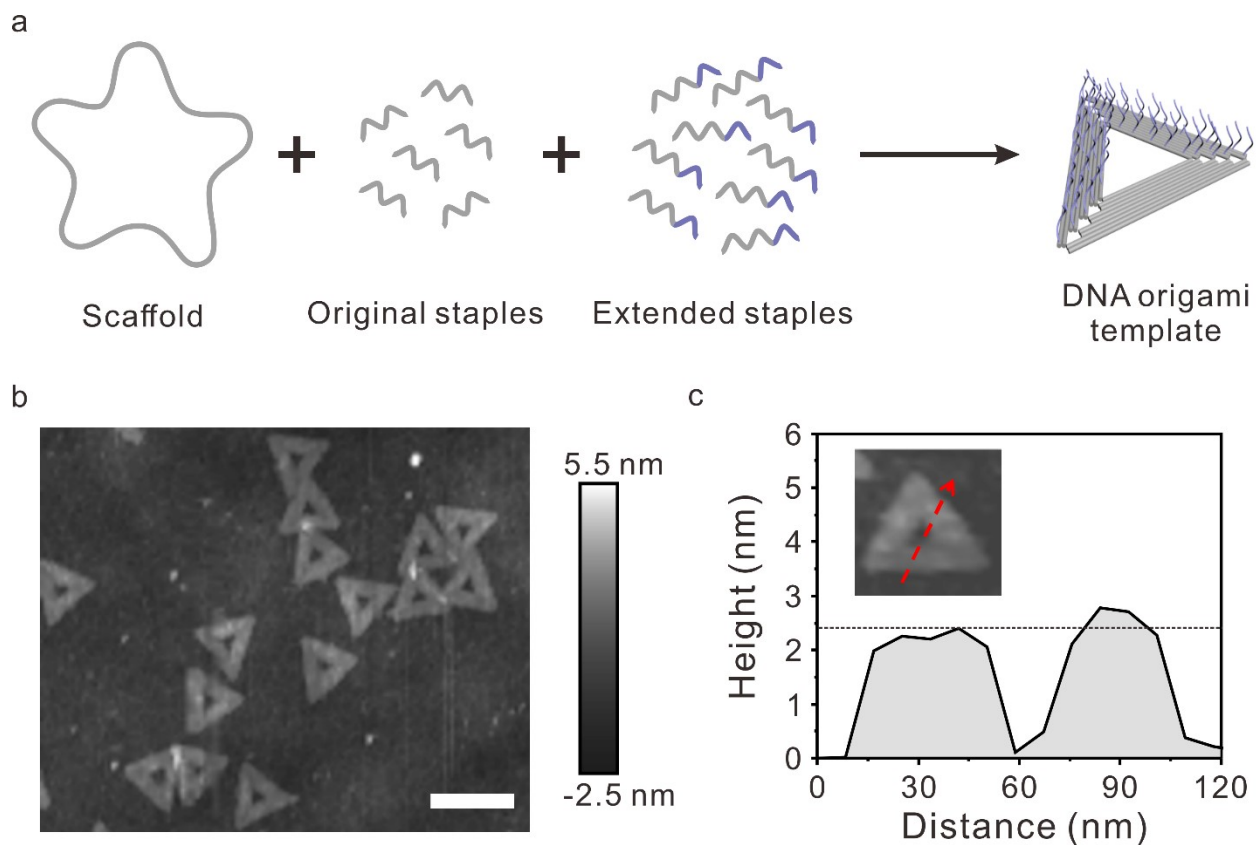

**Figure S2.** (a) Scheme depicting the assembly of triangular DNA origami template with a V-shaped pattern. (b) AFM image of triangular DNA origami template with a V-shaped pattern. Scale bars: 100 nm. (c) Height analysis.

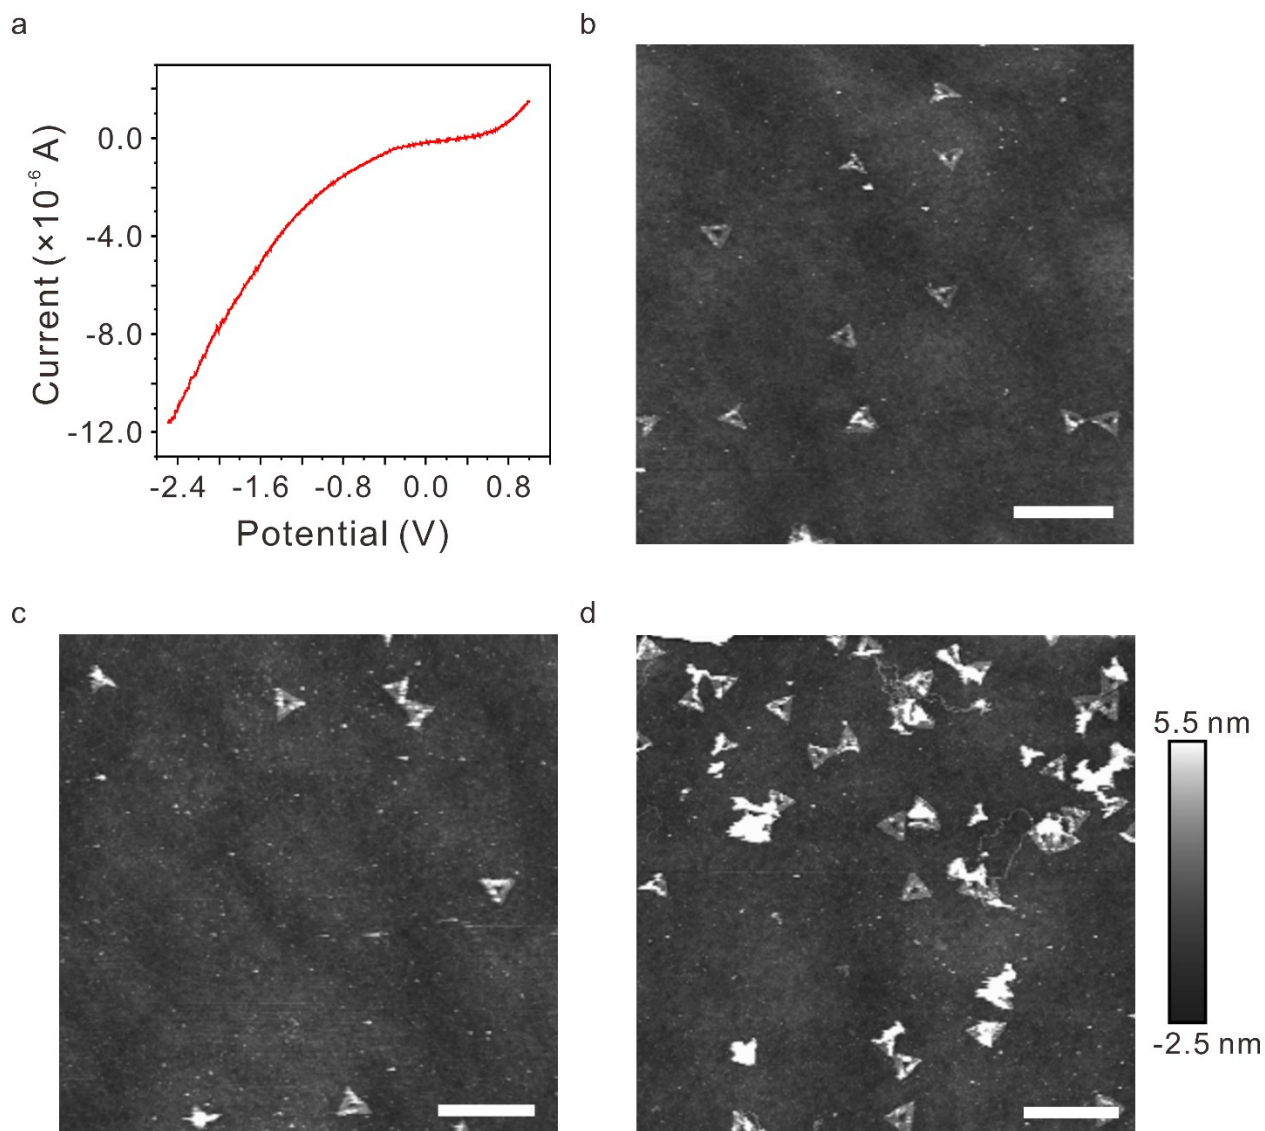

**Figure S3.** (a) LSV curves of the  $\text{Cu}^{2+}$ -containing system. (b–d) Electrodeposition of Cu at different potentials: (b)  $-1.3$  V; (c)  $-1.5$  V; (d)  $-1.7$  V. Scale bar: 400 nm.

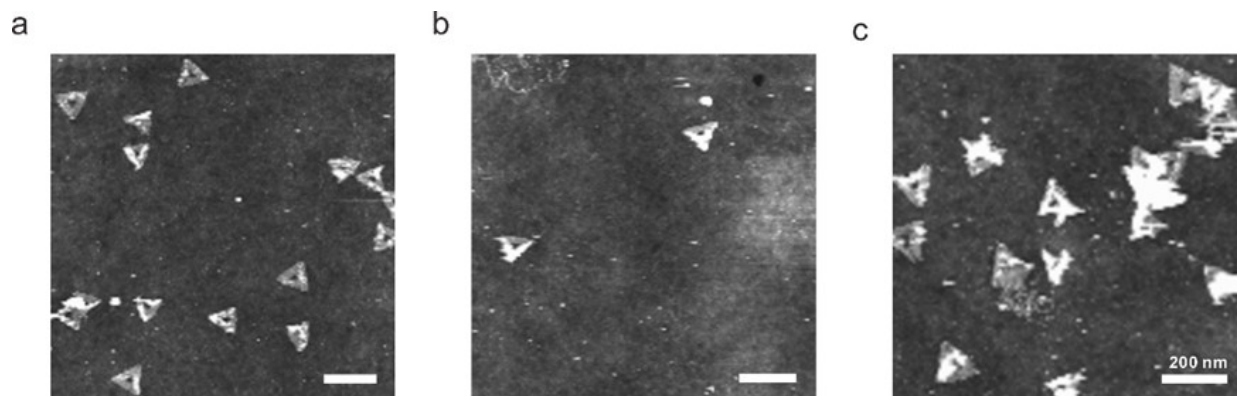

**Figure S4.** AFM images of Cu metal electrodeposition at different deposition times under a fixed potential of  $-1.5$  V and a  $\text{Cu}^{2+}$  concentration of 4 mM: (a) 40 s, (b) 60 s, (c) 80 s. Scale bar: 200 nm.

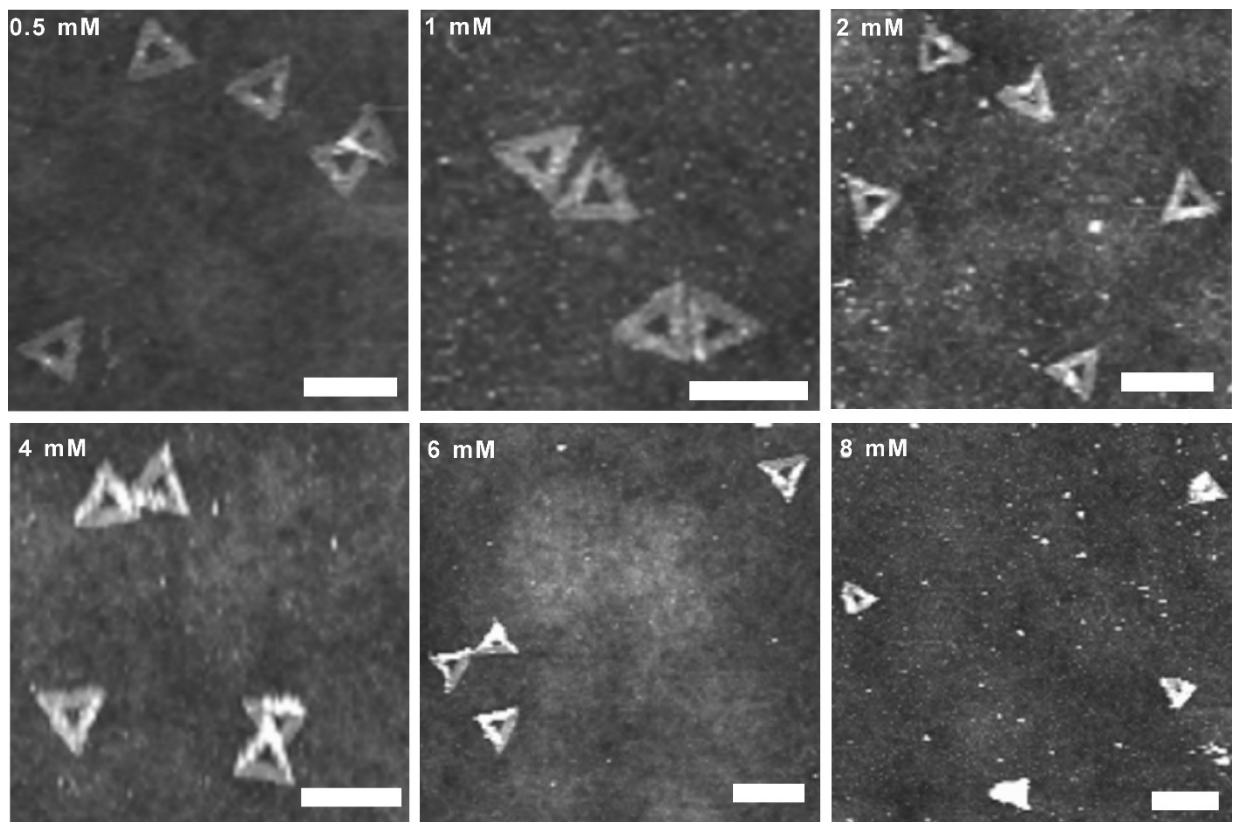

**Figure S5.** AFM images of Cu metal electrodeposition at different concentrations of Cu<sup>2+</sup> (0.5 mM, 1 mM, 2 mM, 4 mM, 6 mM, 8 mM). Scale bar: 200 nm.

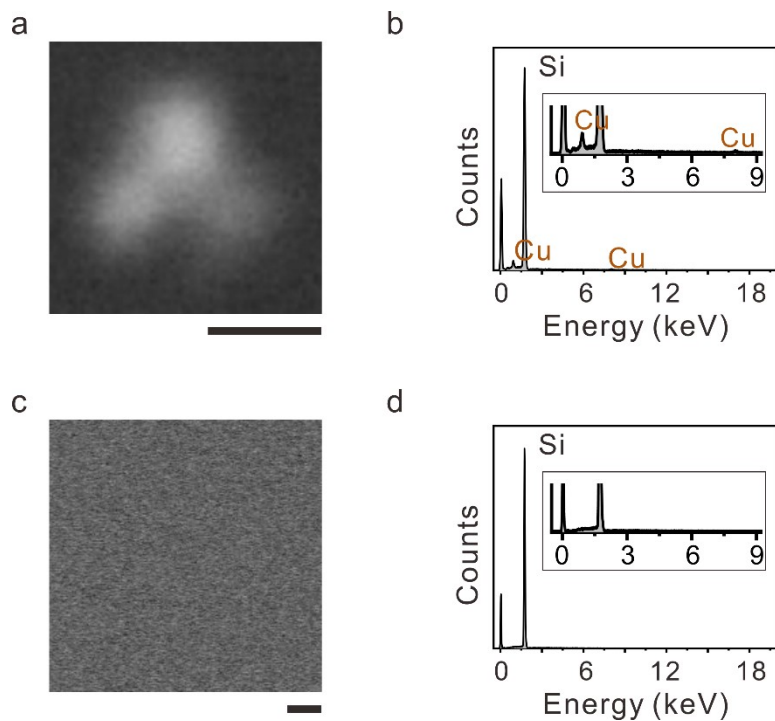

**Figure S6.** (a) SEM image of a Cu nanostructure formed on DNA origami template. Scale bar: 50 nm. (b) Element component analysis of the Cu nanostructure by EDX. (c) SEM image of a bare Si region without the nanostructures. Scale bar: 50 nm. (d) EDX spectrum collected from the bare Si region, showing no characteristic Cu peaks.

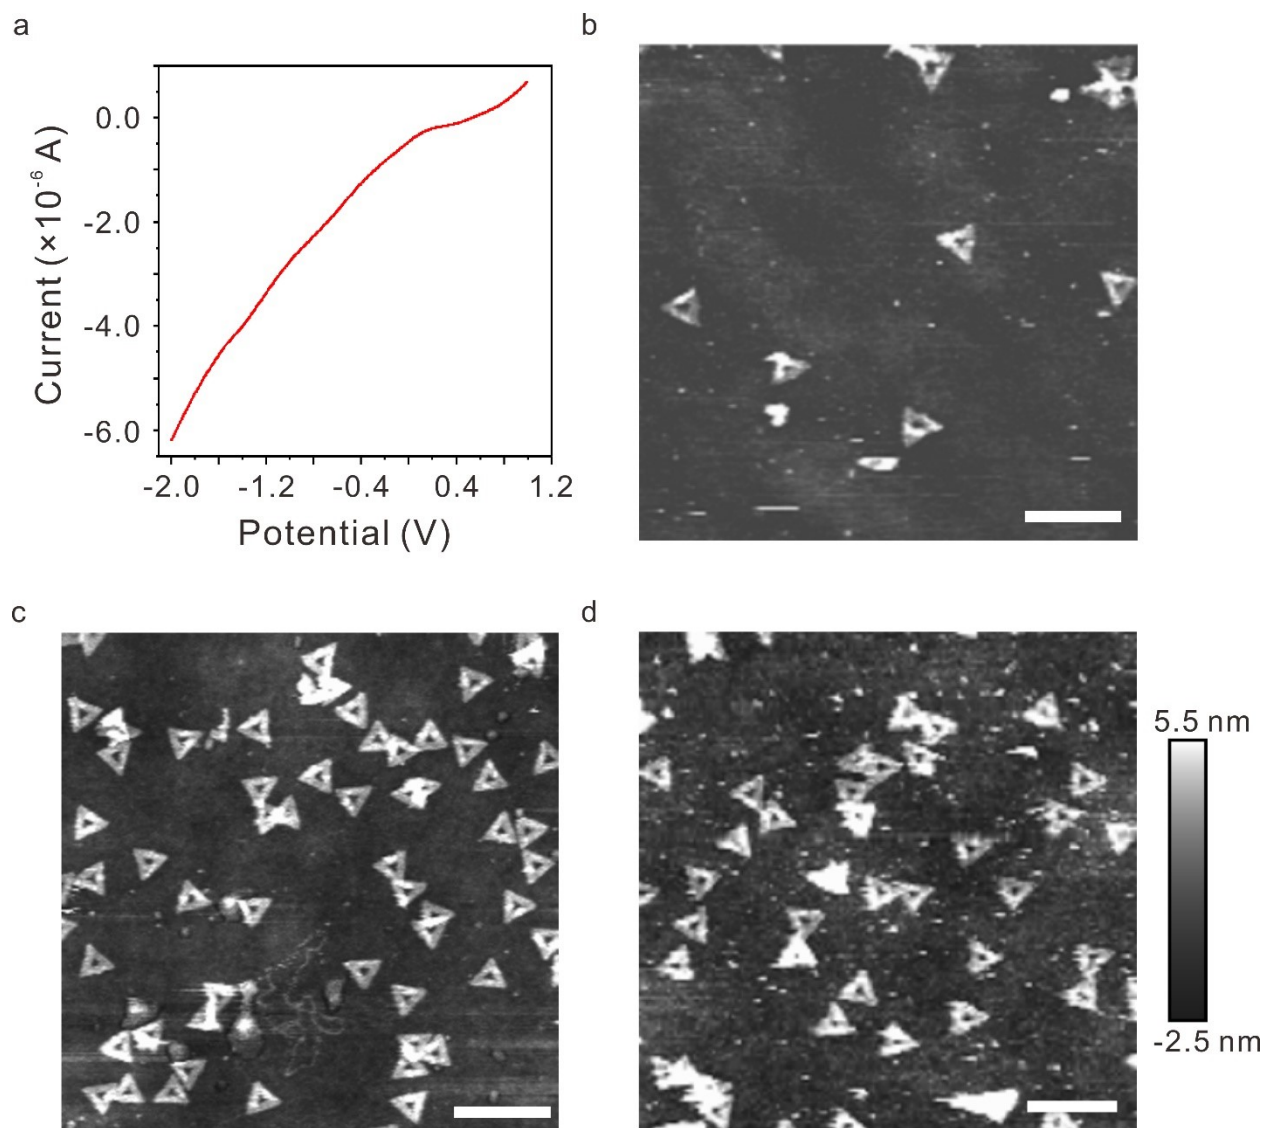

**Figure S7.** (a) LSV curves of the  $\text{Ag}^+$ -containing system. (b–d) Electrodeposition of Ag at different potentials: (b)  $-0.6$  V; (c)  $-0.8$  V; (d)  $-1.0$  V. Scale bar: 400 nm.

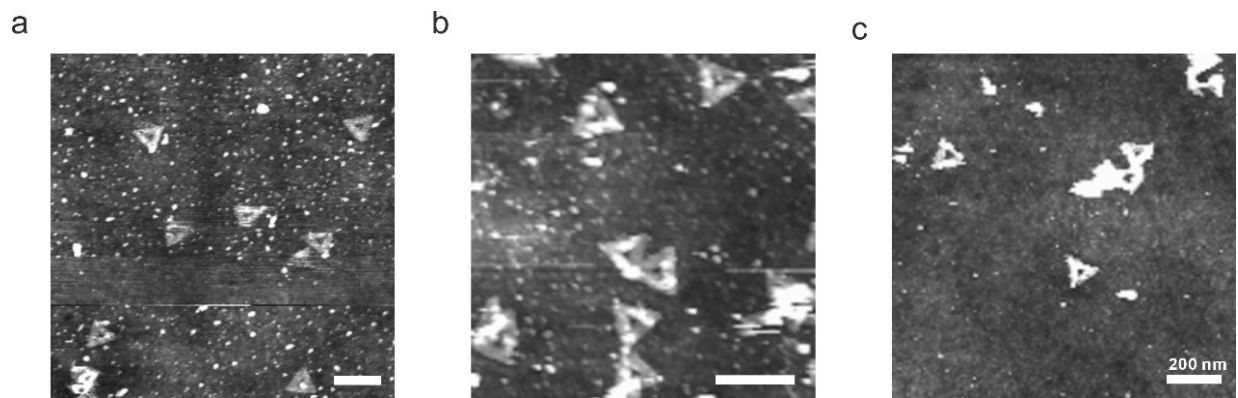

**Figure S8.** AFM images of Ag metal electrodeposition at different deposition times under a fixed potential of  $-0.8$  V and an  $\text{Ag}^+$  concentration of 4 mM: (a) 40 s, (b) 60 s, (c) 80 s. Scale bar: 200 nm.

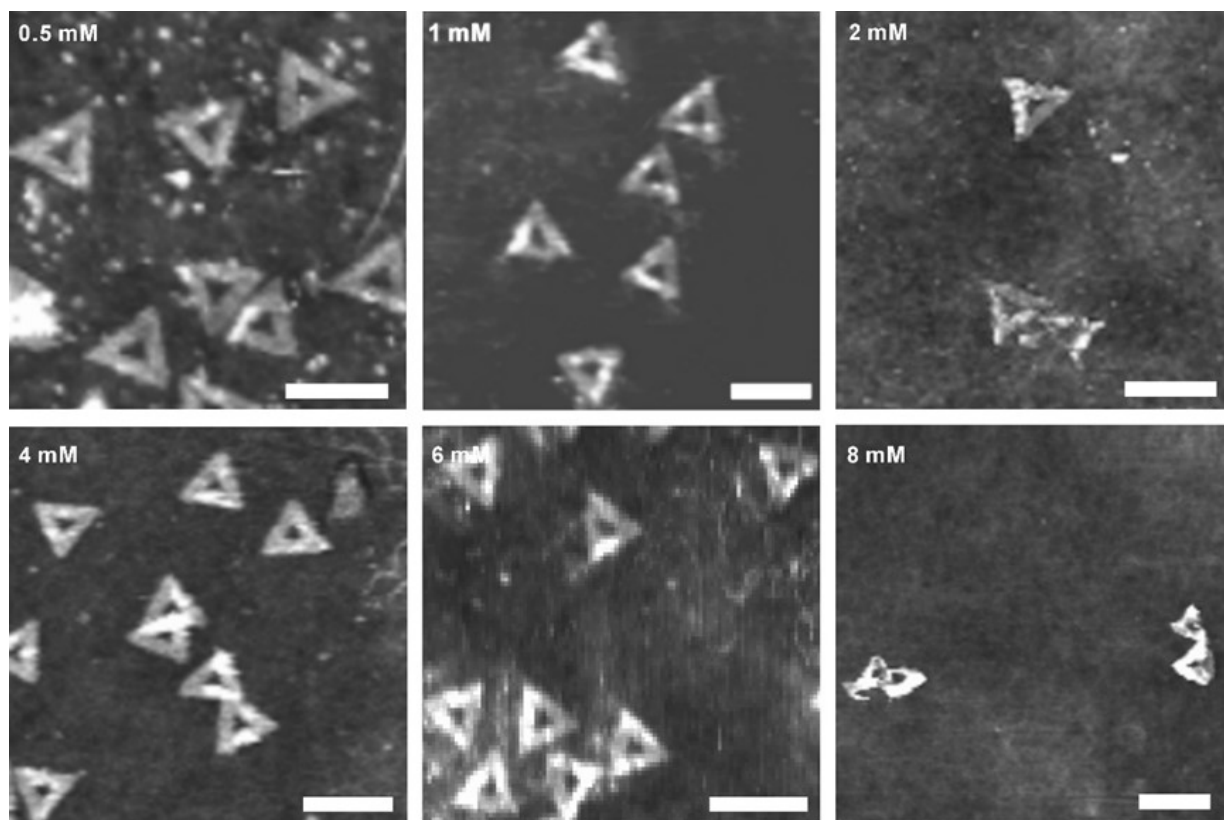

**Figure S9.** AFM images of Ag metal electrodeposition at different concentrations of Ag<sup>+</sup> (0.5 mM, 1 mM, 2 mM, 4 mM, 6 mM, 8 mM). Scale bar: 200 nm.

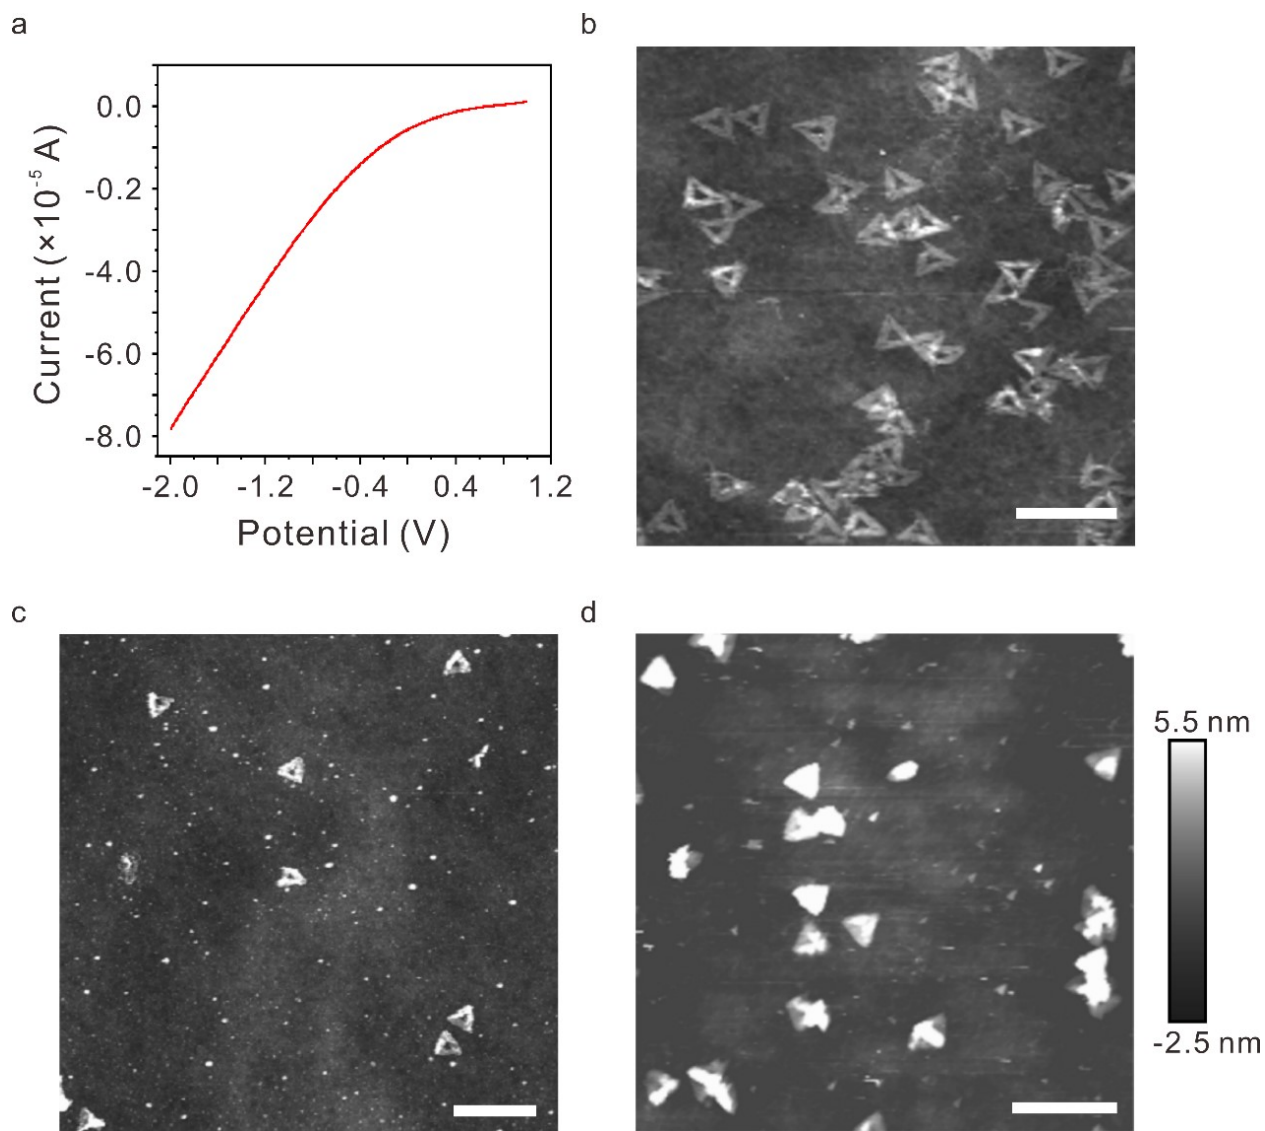

**Figure S10.** (a) LSV curves of the  $\text{AuCl}_4^-$ -containing system. (b–d) Electrodeposition of Au at different potentials: (b) +0.2 V; (c) 0 V; (d) -0.5 V. Scale bar: 400 nm.

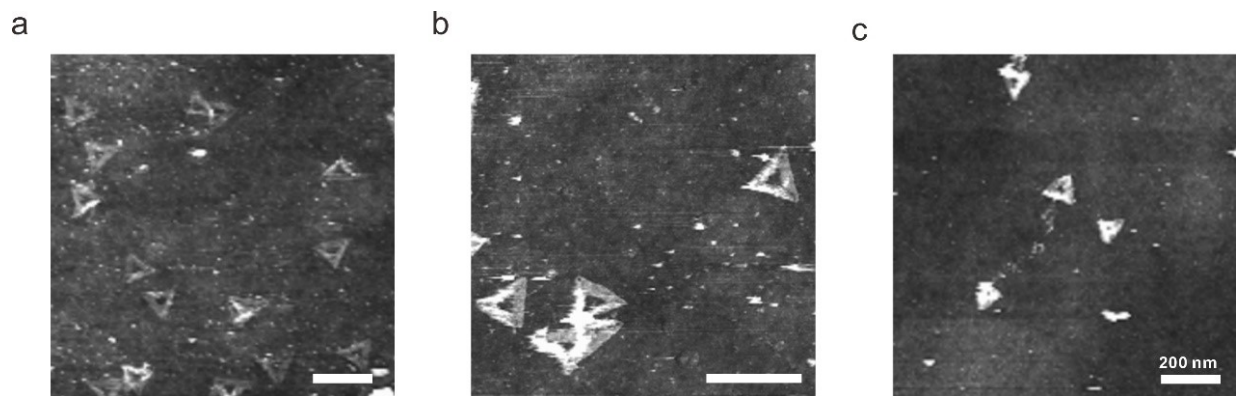

**Figure S11.** AFM images of Au metal electrodeposition at different deposition times under a fixed potential of 0 V and an  $\text{AuCl}_4^-$  concentration of 4 mM: (a) 40 s, (b) 60 s, (c) 80 s. Scale bar: 200 nm.

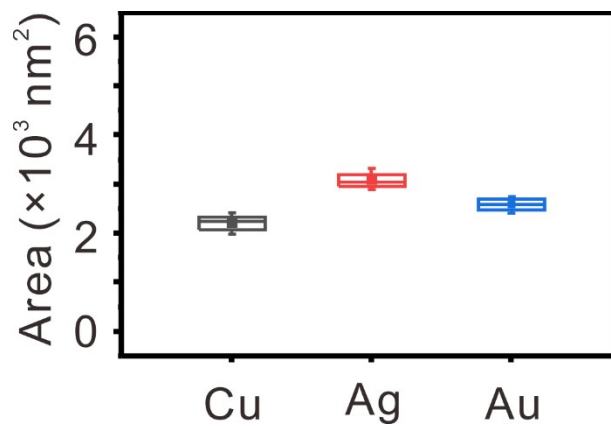

**Figure S12.** Area analysis and comparison of Cu, Ag, and Au structures prepared with 4 mM concentration precursor conditions.

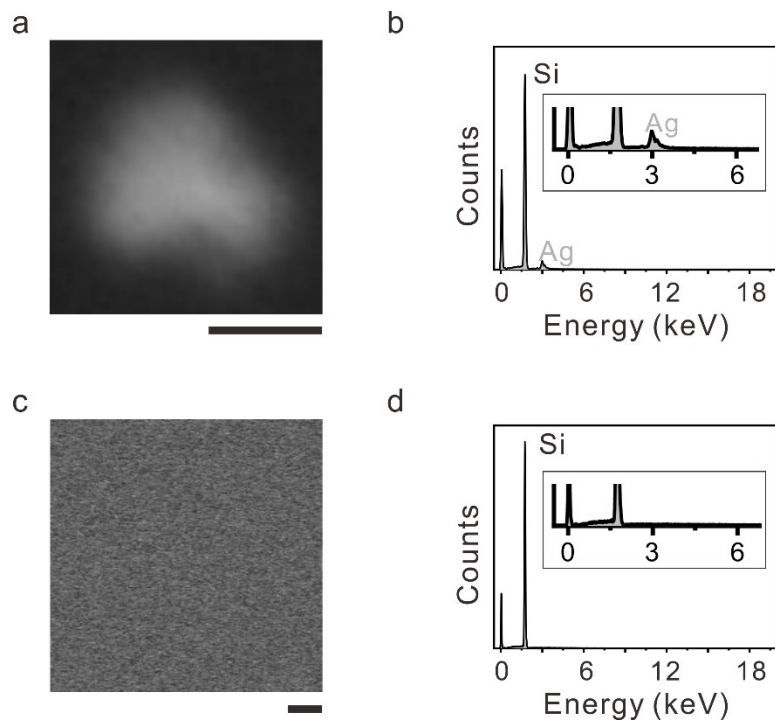

**Figure S13.** (a) SEM image of an Ag nanostructure formed on DNA origami template. Scale bar: 50 nm. (b) Element component analysis of the Ag nanostructure by EDX. (c) SEM image of a bare Si region without the nanostructures. Scale bar: 50 nm. (d) EDX spectrum collected from the bare Si region, showing no characteristic Ag peaks.

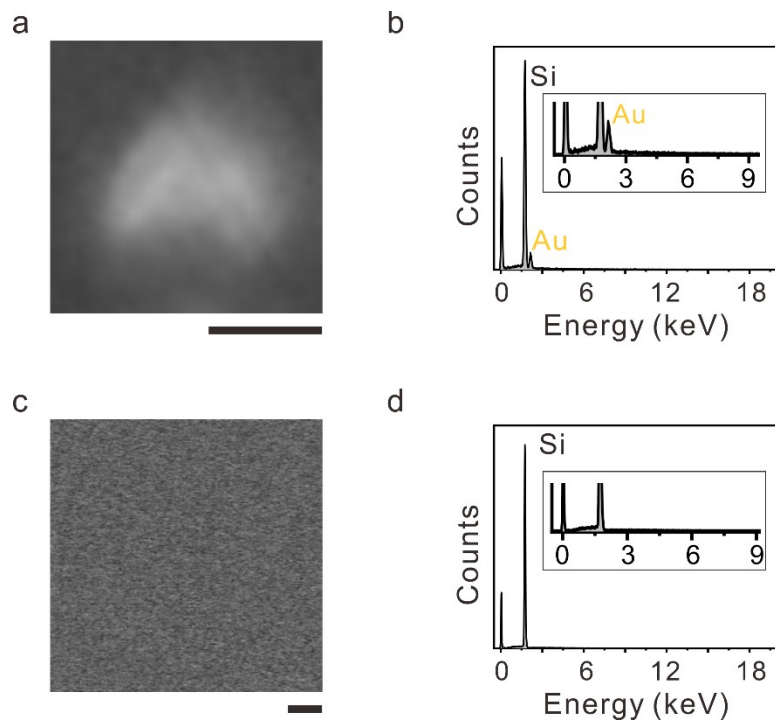

**Figure S14.** (a) SEM image of an Au nanostructure formed on DNA origami template. Scale bar: 50 nm. (b) Element component analysis of the Au nanostructure by EDX. (c) SEM image of a bare Si region without the nanostructures. Scale bar: 50 nm. (d) EDX spectrum collected from the bare Si region, showing no characteristic Ag peaks.

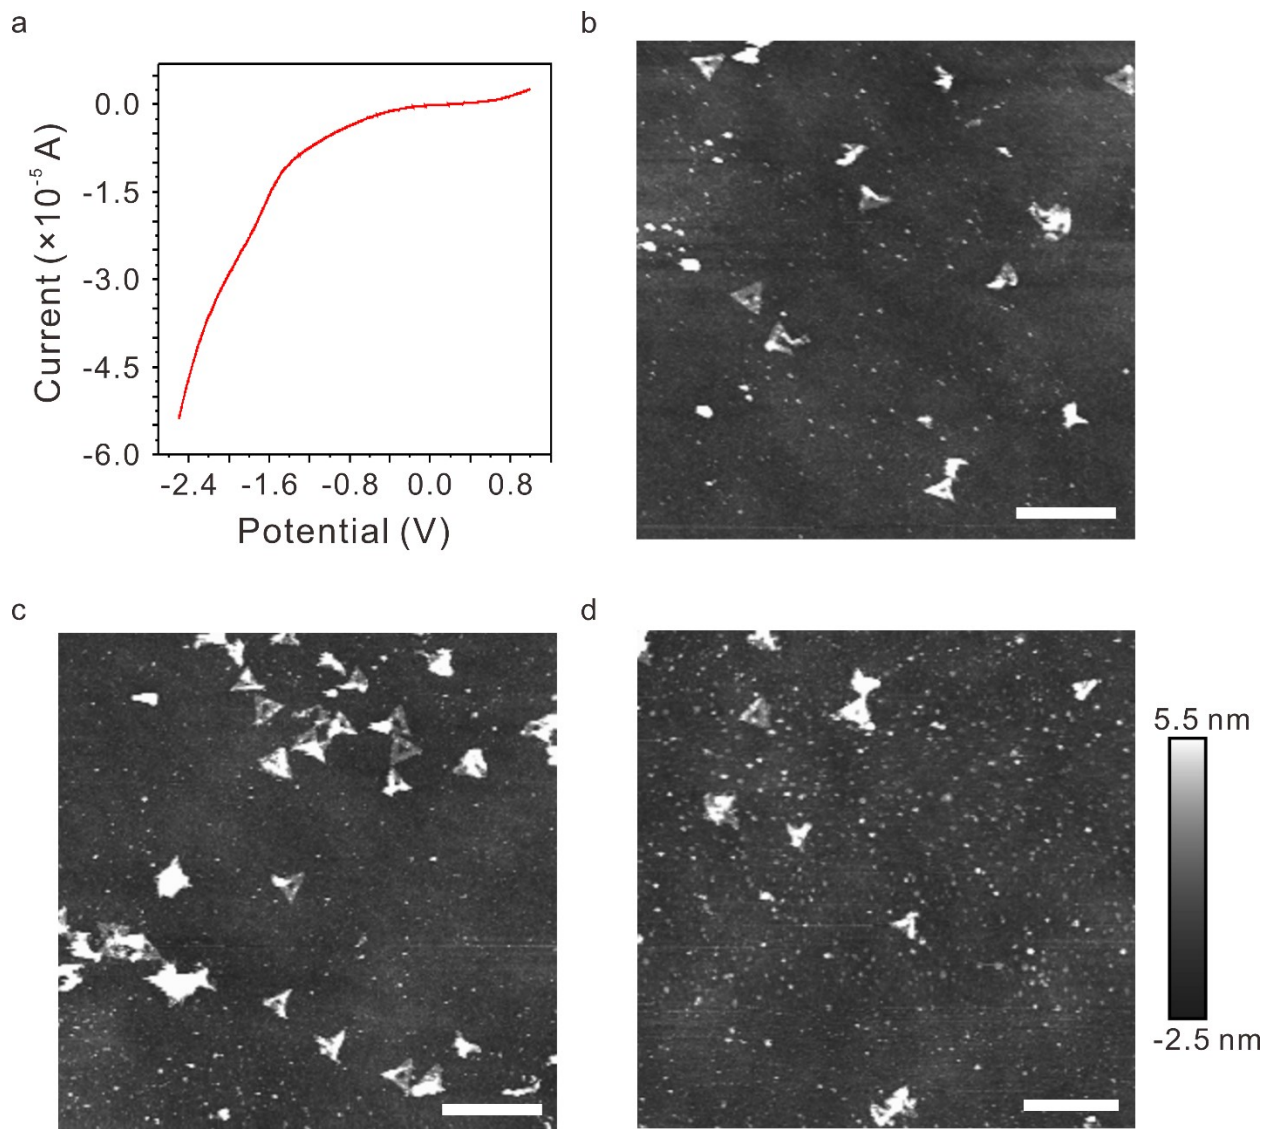

**Figure S15.** (a) LSV curves of the  $\text{Fe}^{2+}$ -containing system. (b–d) Electrodeposition of Fe at different potentials: (b)  $-1.6$  V; (c)  $-1.8$  V; (d)  $-2.0$  V. Scale bar: 400 nm.

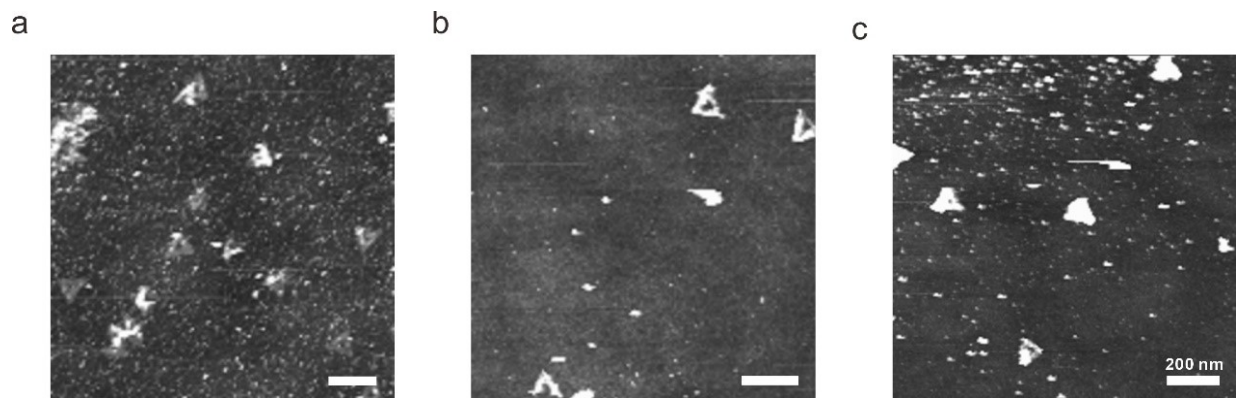

**Figure S16.** AFM images of Fe metal electrodeposition at different deposition times under a fixed potential of  $-1.8$  V and a  $\text{Fe}^{2+}$  concentration of 4 mM: (a) 40 s, (b) 60 s, (c) 80 s. Scale bar: 200 nm.

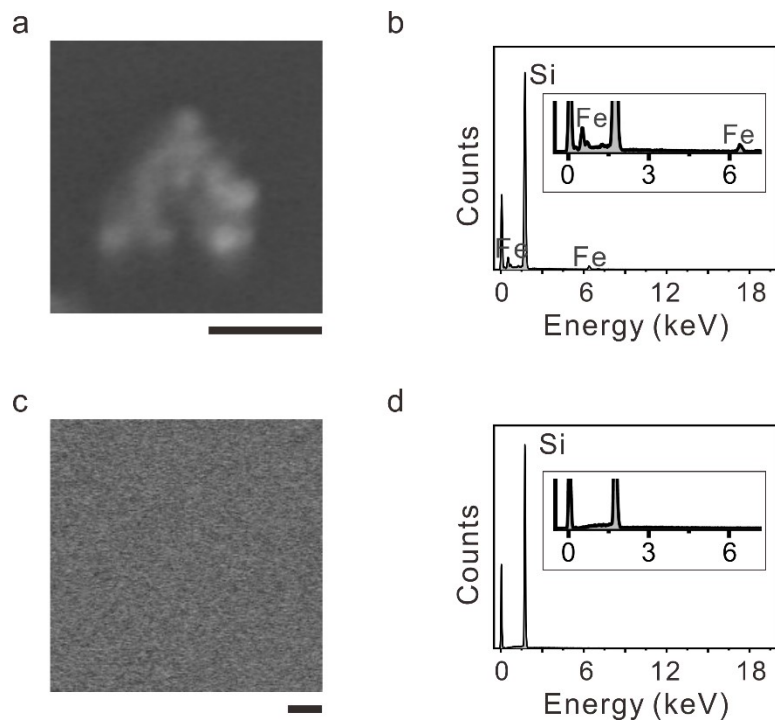

**Figure S17.** (a) SEM image of a Fe nanostructure formed on DNA origami template. Scale bar: 50 nm. (b) Element component analysis of the Fe nanostructure by EDX. (c) SEM image of a bare Si region without the nanostructures. Scale bar: 50 nm. (d) EDX spectrum collected from the bare Si region, showing no characteristic Ag peaks.

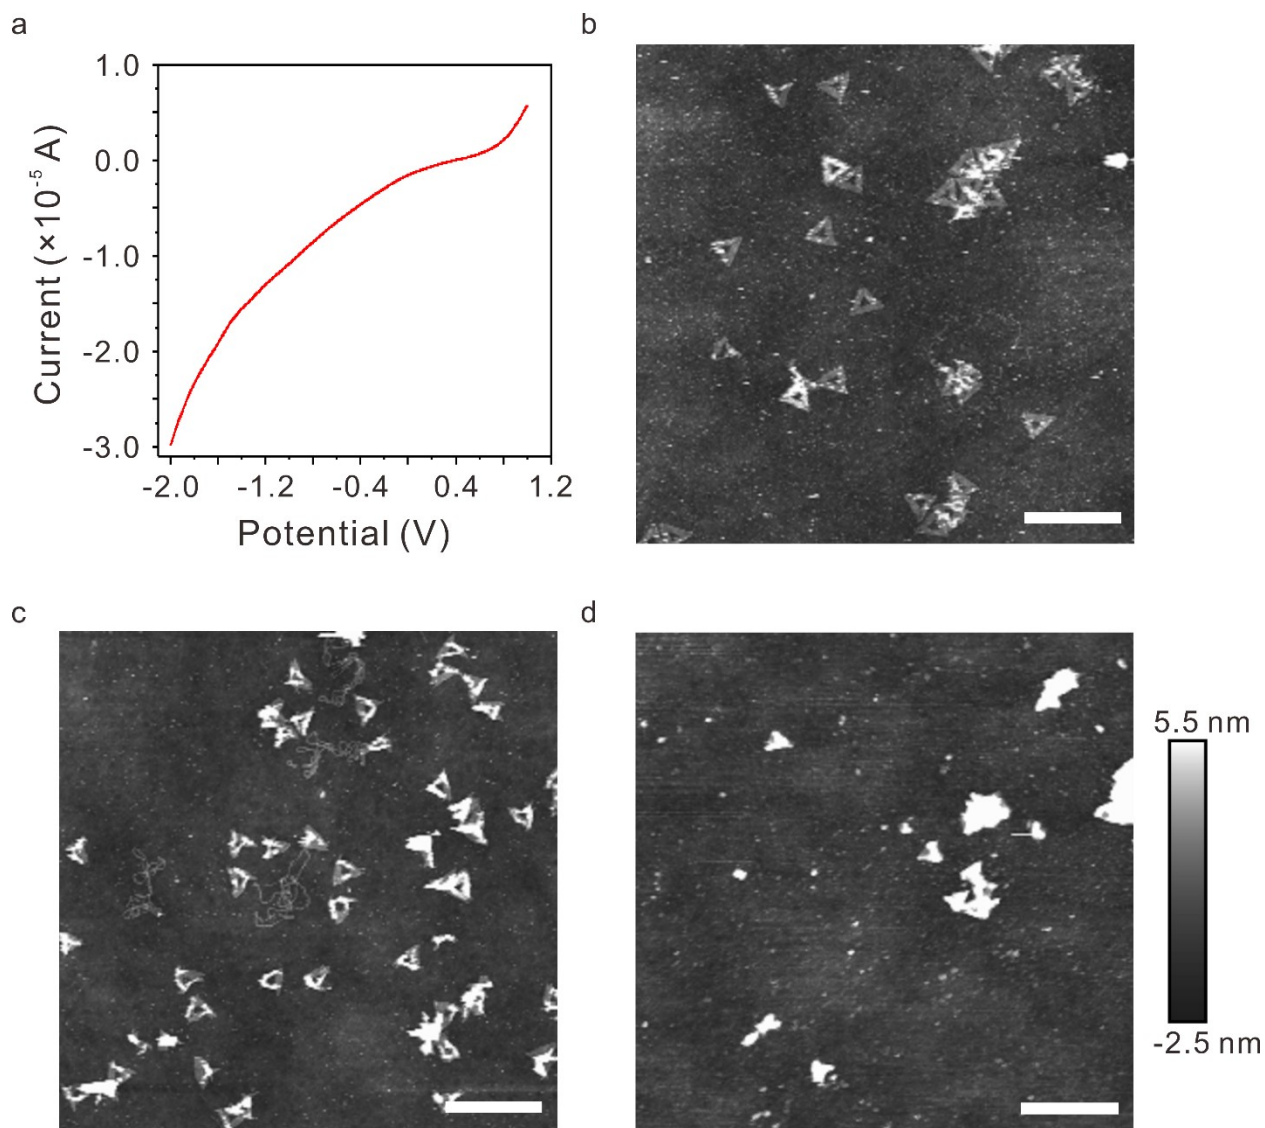

**Figure S18.** (a) LSV curves of the  $\text{Cu}^{2+}$  and  $\text{Ag}^{+}$ -containing system. (b–d) Electrodeposition of Cu-Ag alloy at different potentials: (b)  $-1.5$  V; (c)  $-1.7$  V; (d)  $-2.0$  V. Scale bar: 400 nm.

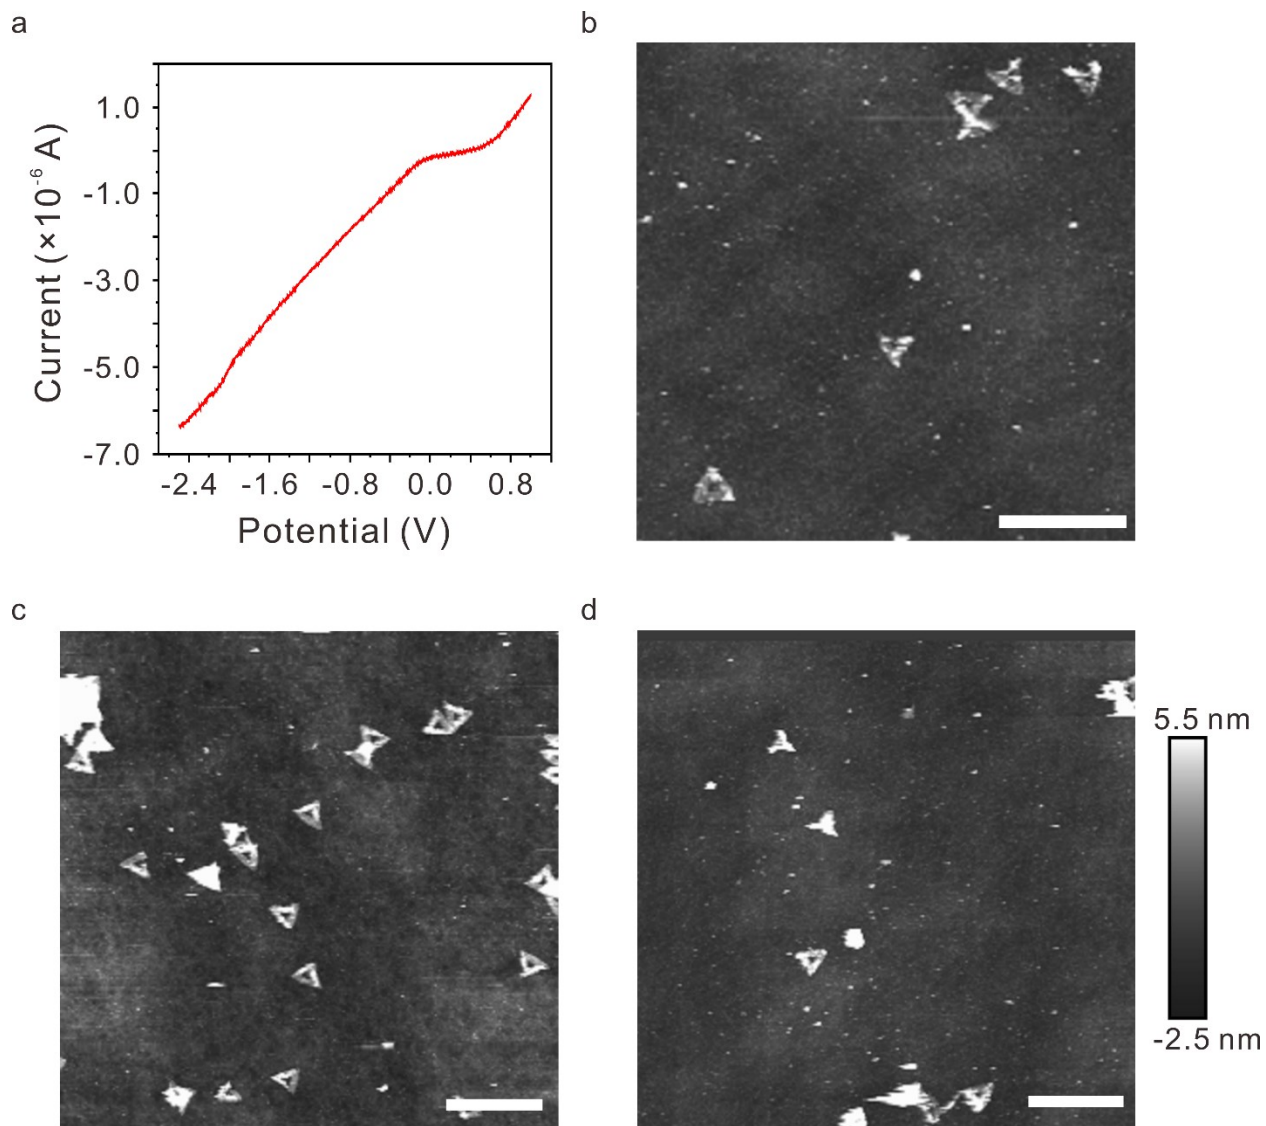

**Figure S19.** (a) LSV curves of the  $\text{Fe}^{2+}$  and  $\text{Cu}^{2+}$ -containing system. (b–d) Electrodeposition of Fe-Cu alloy at different potentials: (b)  $-1.5$  V; (c)  $-2.0$  V; (d)  $-2.5$  V. Scale bar: 400 nm.

**Table S1.** Detailed DNA sequences for triangular DNA origami templates:

| Name | Sequence (5' to 3')                                          |
|------|--------------------------------------------------------------|
| A01  | AAAAAAAAAAAAAAAAACGGGTTTCCTCAAGAGAAGGATTTTGAATTA             |
| A02  | AAAAAAAAAAAAAAAAAAGCGTCATGTCTCTGAATTTACCGACTACCTT            |
| A03  | AAAAAAAAAAAAAAAAAATTCATAATCCCCTTATTAGCGTTTTTCTTACC           |
| A04  | AAAAAAAAAAAAAAAAAATGGTTTATGTCACAATCAATAGATATTA AAC           |
| A05  | AAAAAAAAAAAAAAAAAATTTGATGATTAAGAGGCTGAGACTTGCTCAGTACCAGGCG   |
| A06  | AAAAAAAAAAAAAAAAAACC GGAACCCAGAATGGAAAGCGCAACATGGCT          |
| A07  | AAAAAAAAAAAAAAAAAAGACAACATTTTCGGTCATAGCCAAAATCA              |
| A08  | AAAAAAAAAAAAAAAAAAGACGGGAGAATTA ACTCGGAATAAGTTTATTTCCAGCGCC  |
| A09  | AAAAAAAAAAAAAAAAAAGATAAGTGCCGTCGAGCTGAAACATGAAAGTATACAGGAG   |
| A10  | AAAAAAAAAAAAAAAAAATGTACTGGAAATCCTCATTA AAGCAGAGCCAC          |
| A11  | AAAAAAAAAAAAAAAAAACCCGAAAGCGCGTTTTTCATCGGAAGGGCGA            |
| A12  | AAAAAAAAAAAAAAAAACATTCAACAAACGCAAAGACACCAGAACACCCTGAACAAA    |
| A13  | AAAAAAAAAAAAAAAAATTTAACGGTTCGGAACCTATTATTAGGGTTGATATAAGTA    |
| A14  | AAAAAAAAAAAAAAAAAACTCAGAGCATATTCACAAACAAATTAATAAGT           |
| A15  | AAAAAAAAAAAAAAAAAAGGAGGGAATTTAGCGTCAGACTGTCCGCCTCC           |
| A16  | AAAAAAAAAAAAAAAAAAGTCAGAGGGTAATTGATGGCAACATATAAAAGCGATTGAG   |
| A17  | AAAAAAAAAAAAAAAAAATAGCCC GGAATAGGTGAATGCCCCCTGCCTATGGTCAGTG  |
| A18  | AAAAAAAAAAAAAAAAAACCTTGAGTCAGACGATTGGCCTTGCGCCACCC           |
| A19  | AAAAAAAAAAAAAAAAAATCAGAACCCAGAATCAAGTTTGCCGGTAAATA           |
| A20  | AAAAAAAAAAAAAAAAAATTGACGGAAATACATACATAAAGGGCGCTAATATCAGAGA   |
| A21  | AAAAAAAAAAAAAAAAAACAGAGCCAGGAGGTTGAGGCAGGTAACAGTGCCCG        |
| A22  | AAAAAAAAAAAAAAAAAATTAAGGCCGTAATCAGTAGCGAGCCACCCT             |
| A23  | AAAAAAAAAAAAAAAAAAGATAACCCACAAGAATGTTAGCAAACGTAGAAAATTATTC   |
| A24  | AAAAAAAAAAAAAAAAAAGCCGCCAGCATTGACACCACCCTC                   |
| A25  | AAAAAAAAAAAAAAAAAAGAGCCGCACCATCGATAGCAGCATGAATTAT            |
| A26  | AAAAAAAAAAAAAAAAAACCCGTCACCTTATTACGCAGTATTGAGTTAAGCCCAATA    |
| A27  | AAAAAAAAAAAAAAAAAAGCCATTTAAACGTCACCAATGAACACCAGAACCA         |
| A28  | AAAAAAAAAAAAAAAAAATAAGAGCAAGAAACATGGCATGATTAAGACTCCGACTTG    |
| A29  | AAAAAAAAAAAAAAAAAACCATTAGCAAGGCCGGGGAATTA                    |
| A30  | AAAAAAAAAAAAAAAAAAGAGCCAGCGAATACCCAAAAGAACATGAAATAGCAATAGC   |
| A31  | AAAAAAAAAAAAAAAAATATCTTACCGAAGCCCAAACGCAATAATAACGAAAATCACCAG |
| A32  | AAAAAAAAAAAAAAAAACAGAAGGAAACCGAGGTTTTTAAGAAAAGTAAGCAGATAGCCG |
| A33  | AAAAAAAAAAAAAAAAAACCTTTTTTCATTTAACAATTTTCATAGGATTAG          |
| A34  | AAAAAAAAAAAAAAAAAATTTAACCTATCATAGGTCTGAGAGTTCCAGTA           |
| A35  | AAAAAAAAAAAAAAAAAAGTATAAAATATGCGTTATACAAAGCCATCTT            |
| A36  | AAAAAAAAAAAAAAAAACAAGTACCTCATTCCAAGAACGGGAAATTCAT            |
| A37  | AAAAAAAAAAAAAAAAAAGAGAATAACATAAAAACAGGGAAGCGCATT A           |

A38 AAAAAAAAAAAAAAAAAAAAAACAAAATTAATTAATGGAACAGTACATTAGTGAAT  
A39 AAAAAAAAAAAAAAAAAAATTATCAAACCGGCTTAGGTTGGGTAAGCCTGT  
A40 AAAAAAAAAAAAAAAAAAATTAGTATCGCCAACGCTCAACAGTCGGCTGTC  
A41 AAAAAAAAAAAAAAAAAATTTCTTAGCACTCATCGAGAACAATAGCAGCCTTTACAG  
A42 AAAAAAAAAAAAAAAAAAAGAGTCAAAAATCAATATATGTGATGAAACAAACATCAAG  
A43 AAAAAAAAAAAAAAAAAAACTAGAAATATATACTATATGTACGCTGAGA  
A44 AAAAAAAAAAAAAAAAAAATCAATAATAGGGCTTAATTGAGAATCATAATT  
A45 AAAAAAAAAAAAAAAAAAACGTCAAAAATGAAAAGCAAGCCGTTTTTATGAAACCAA  
A46 AAAAAAAAAAAAAAAAAAAGAGCAAAAGAAGATGAGTGAATAACCTTGCTTATAGCTTA  
A47 AAAAAAAAAAAAAAAAAAAGATTAAGAAATGCTGATGCAAATCAGAATAAA  
A48 AAAAAAAAAAAAAAAAAAACACCGGAATCGCCATATTTAACAAAATTTACG  
A49 AAAAAAAAAAAAAAAAAAAGCATGTATTTTCATCGTAGGAATCAAACGATTTTTTGT  
A50 AAAAAAAAAAAAAAAAAAACATAGCGCTGTAATCGTCGCTATTCATTTCAATTACCT  
A51 AAAAAAAAAAAAAAAAAAAGTTAAATACAATCGCAAGACAAAGCCTTGAAA  
A52 AAAAAAAAAAAAAAAAAAACCCATCCTCGCCAACATGTAATTTAATAAGGC  
A53 AAAAAAAAAAAAAAAAAATCCCAATCCAAATAAGATTACCGCGCCAATAAATAATAT  
A54 AAAAAAAAAAAAAAAAAAATCCCTTAGAATAACGCGAGAAAACTTTACCGACC  
A55 AAAAAAAAAAAAAAAAAAAGTGTGATAAGGCAGAGGCATTTTCAGTCCTGA  
A56 AAAAAAAAAAAAAAAAAACAAGAAAGCAAGCAAATCAGATAACAGCCATATTATTTA  
A57 AAAAAAAAAAAAAAAAAAAGTTTGAAATTCAAATATATTTTAG  
A58 AAAAAAAAAAAAAAAAAAATAGATAGAGCCAGTAATAAGAGATTTAATG  
A59 AAAAAAAAAAAAAAAAAAGCCAGTTACAAAATAATAGAAGGCTTATCCGGTTATCAAC  
A60 AAAAAAAAAAAAAAAAAAATTCTGACCTAAAATATAAAGTACCGACTGCAGAAC  
A61 AAAAAAAAAAAAAAAAAAAGCGCCTGTTATTCTAAGAACGCGATTCCAGAGCCTAATTT  
A62 AAAAAAAAAAAAAAAAAAATCAGCTAAAAAAGTAAAGTAATT  
A63 AAAAAAAAAAAAAAAAAACGCTAACGAGCGTCTGGCGTTTTAGCGAACCCAACATGT  
A64 AAAAAAAAAAAAAAAAAACGACAATAAATCCCGACTTGCGGGAGATCCTGAATCTTACCA  
A65 AAAAAAAAAAAAAAAAAATGCTATTTTGCACCCAGCTACAATTTTGTGTTTGAAGCCTTAAA  
B01 AAAAAAAAAAAAAAAAAATCATATGTGTAATCGTAAAACTAGTCATTTTC  
B02 AAAAAAAAAAAAAAAAAAAGTGAGAAAATGTGTAGGTAAGATACAACTTT  
B03 AAAAAAAAAAAAAAAAAAAGGCATCAAATTTGGGGCGCGAGCTAGTTAAAG  
B04 AAAAAAAAAAAAAAAAAAATTCGAGCTAAGACTTCAAATATCGGGAACGAG  
B05 AAAAAAAAAAAAAAAAAACAGTCAAAGAGAATCGATGAACGACCCCGGTTGATAATC  
B06 AAAAAAAAAAAAAAAAAAATAGTAGTATGCAATGCCTGAGTAGGCCGGAG  
B07 AAAAAAAAAAAAAAAAAAACAGACGTTTAGCTATATTTTCTTCTACTA  
B08 AAAAAAAAAAAAAAAAAAAGAATACCACATTTCAACTTAAGAGGAAGCCCGATCAAAGCG  
B09 AAAAAAAAAAAAAAAAAAAGAAAAGCCCCAAAAGAGTCTGGAGCAAACAATCACCAT  
B10 AAAAAAAAAAAAAAAAAACAATATGACCCTCATATATTTTAAAGCATTAA  
B11 AAAAAAAAAAAAAAAAAACATCCAATAAATGGTCAATAACCTCGGAAGCA

B12 AAAAAAAAAAAAAAAAAAACTCCAAGATTGCATCAAAAAGATAATGCAGATACATAA  
B13 AAAAAAAAAAAAAAAAAACGTTCTAGTCAGGTCATTGCCTGACAGGAAGATTGTATAA  
B14 AAAAAAAAAAAAAAAAAACAGGCAAGATAAAAAATTTTAGAATATTCAAC  
B15 AAAAAAAAAAAAAAAAAAGATTAGAGATTAGATACATTTGCAAATCATA  
B16 AAAAAAAAAAAAAAAAAACGCCAAAAGGAATTACAGTCAGAAGCAAAGCGCAGGTCAG  
B17 AAAAAAAAAAAAAAAAAAGCAAATATTTAAATTGAGATCTACAAAGGCTACTGATAAA  
B18 AAAAAAAAAAAAAAAAAATTAATGCCTTATTTCAACGCAAGGGCAAAGAA  
B19 AAAAAAAAAAAAAAAAAATTAGCAAATAGATTTAGTTTGACCAGTACCTT  
B20 AAAAAAAAAAAAAAAAAATAATTGCTTTACCCTGACTATTATGAGGCATAGTAAGAGC  
B21 AAAAAAAAAAAAAAAAAATAAAGCCTTTCGCGGAGAAGCCTGGAGAGGGTAG  
B22 AAAAAAAAAAAAAAAAAATAAGAGGTCAATTCTGCGAACGAGATTAAGCA  
B23 AAAAAAAAAAAAAAAAAAACTATCATAACCCATCAAAAATCAGGTCTCCTTTTGA  
B24 AAAAAAAAAAAAAAAAAAATGACCCTGTAATACTTCAGAGCA  
B25 AAAAAAAAAAAAAAAAAATAAAGCTATATAACAGTTGATTCCCATTTTTG  
B26 AAAAAAAAAAAAAAAAAACGGATGGCACGAGAATGACCATAATCGTTTACCAGACGAC  
B27 AAAAAAAAAAAAAAAAAATAATTGCTTGGAAGTTTCATTCAAATCGGTTGTA  
B28 AAAAAAAAAAAAAAAAAAGATAAAACCAAATATTAACAGTTCAGAAATTAGAGCT  
B29 AAAAAAAAAAAAAAAAAAACTAAAGTACGGTGTGCAATATAA  
B30 AAAAAAAAAAAAAAAAAATGCTGTAGATCCCCCTCAAATGCTGCGAGAGGCTTTTGA  
B31 AAAAAAAAAAAAAAAAAAAGAAGTTTTGCCAGCATAAATATTCATTGACTCAACATGTT  
B32 AAAAAAAAAAAAAAAAAAATACTGCGGAATCGTAGGGGTAATAGTAAAATGTTTAGACT  
B33 AAAAAAAAAAAAAAAAAAAGGATAGCTCAGAGCCACCACCCCATGTCAA  
B34 AAAAAAAAAAAAAAAAAAACACAGTTTATGGGATTTTGCTAATCAAAGG  
B35 AAAAAAAAAAAAAAAAAAGCCGCTTTGCTGAGGCTTGAGGGGAAAAGGT  
B36 AAAAAAAAAAAAAAAAAAAGCGCAGACTCCATGTTACTTAGCCCGTTTTAA  
B37 AAAAAAAAAAAAAAAAAACAGGTAGAAAGATTCATCAGTTGAGATTTAG  
B38 AAAAAAAAAAAAAAAAAACCTCAGAACC GCCACCCAAGCCCAATAGGAACGTAAATGA  
B39 AAAAAAAAAAAAAAAAAAATTTTCTGTCAGCGGAGTGAGAATACCGATAT  
B40 AAAAAAAAAAAAAAAAAAATTCGGTCTGCGGGATCGTCACCCGAAATCCG  
B41 AAAAAAAAAAAAAAAAAACGACCTGCGGTCAATCATAAGGGAACGGAACAACATTATT  
B42 AAAAAAAAAAAAAAAAAAGACGTTACCATGTACCGTAACACCCCTCAGAACCGCCAC  
B43 AAAAAAAAAAAAAAAAAACACGCATAAGAAAGGAACA ACTAAGTCTTTCC  
B44 AAAAAAAAAAAAAAAAAAATTGTGTCTCAGCAGCGAAAGACACCATCGCC  
B45 AAAAAAAAAAAAAAAAAATTAATAAACGAACTAACCGAACTGACCAACTCCTGATAA  
B46 AAAAAAAAAAAAAAAAAAAGTTTAGTACCGCCATGAGTTTCGTCACCAGGATCTAAA  
B47 AAAAAAAAAAAAAAAAAAAGTTTTGTCAGGAATTGCGAATAATCCGACAAT  
B48 AAAAAAAAAAAAAAAAAAAGACAACAAGCATCGGAACGAGGGTGAGATTTG  
B49 AAAAAAAAAAAAAAAAAAATATCATCGTTGAAAGAGGACAGATGGAAGAAAATCTACG  
B50 AAAAAAAAAAAAAAAAAAAGCGTAACTACAACTACAACGCCTATCACCGTACTCAGG

B51                   AAAAAAAAAAAAAAAAATAGTTGCGAATTTTTTTCACGTTGATCATAGTT  
 B52                   AAAAAAAAAAAAAAAAAGTACAACGAGCAACGGCTACAGAGGATACCGA  
 B53                   AAAAAAAAAAAAAAAAACCAGTCAGGACGTTGGAACGGTGTACAGACCGAAACAAA  
 B54                   AAAAAAAAAAAAAAAAACAGACAGCCAAATCTCCAAAAAAAAATTTCTTA  
 B55                   AAAAAAAAAAAAAAAAAACAGCTTGCTTTGAGGACTAAAGCGATTATA  
 B56                   AAAAAAAAAAAAAAAAACCAAGCGCAGGCGCATAGGCTGGCAGAACTGGCTCATTAT  
 B57                   AAAAAAAAAAAAAAAAACGAGGTGAGGCTCCAAAAGGAGCC  
 B58                   AAAAAAAAAAAAAAAAACCCCGACTTTTTTCATGAGGAACTTGCTTT  
 B59                   AAAAAAAAAAAAAAAAACCTTATGCGATTTTATGACCTTCATCAAGAGCATCTTTG  
 B60                   AAAAAAAAAAAAAAAAACGGTTTATCAGGTTTCCATTAAACGGGAATACACT  
 B61                   AAAAAAAAAAAAAAAAAACTTAATCTTGACAAGAACTTAATCATTGTGAATT  
 B62                   AAAAAAAAAAAAAAAAAAGGCAAAAGTAAAATACGTAATGCC  
 B63                   AAAAAAAAAAAAAAAAATGGTTTAATTTCAACTCGGATATTCATTACCCACGAAAGA  
 B64                   AAAAAAAAAAAAAAAAACCAACCTAAAAAATCAACGTAACAAATAAATTGGGCTTGAGA  
 B65                   AAAAAAAAAAAAAAAAACCTGACGAGAAACACCAGAACGAGTAGGCTGCTCATTGAGTGA

---

Other sequences can be found in the sequences list for the triangle origami.<sup>1</sup>

## References

1. S. Pal, Z. Deng, H. Wang, S. Zou, Y. Liu and H. Yan, *J. Am. Chem. Soc.*, 2011, **133**, 17606-17609.
